# Supplementary material
Source: PubMed Central journal article supplement (PMC2063483)
Supplement: 7601874s1.pdf [file 7601874s1.pdf]

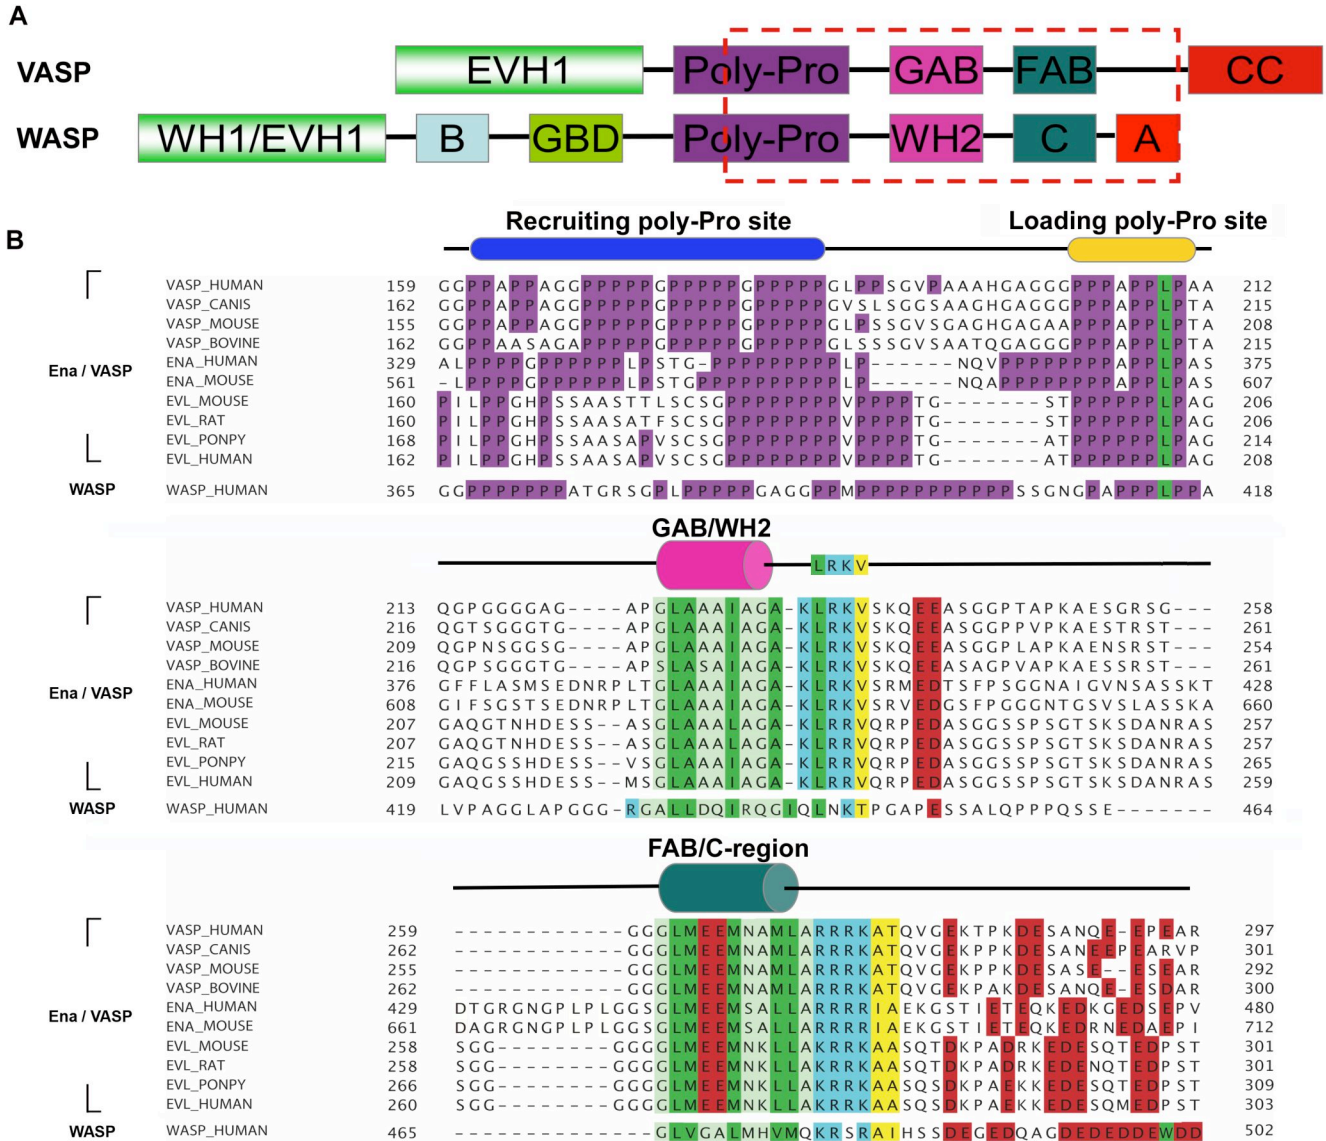

**Supplementary Figure 1.** Conserved domain architecture of the poly-Pro and actin-binding regions of Ena/VASP and WASP. **(A)** Domain organization of Ena/VASP (EVH1, Ena/VASP homology domains 1; poly-Pro sequence; GAB and FAB, globular- and filamentous-actin binding domains; CC, coiled-coil) and WASP (WH1, WASP-homology domain 1; B, basic region; GBD, G-protein-binding domain; poly-Pro sequence; WH2, WASP-homology domain 2; C, central-region; A, acidic-region). A similar color scheme was used to stress the analogy existing between the various domains of Ena/VASP and WASP. **(B)** Sequence alignment of the region highlighted by a red dashed rectangle in part **A** of this figure (accession numbers are: VASP\_HUMAN, P50552; VASP\_CANIS, P50551; VASP\_MOUSE, P70460; VASP\_BOVINE, Q2TA49; ENA\_HUMAN, Q8N8S7; ENA\_MOUSE, O03173; EVL\_MOUSE, P70429; EVL\_RAT, O08719; EVL\_PONPY, Q5R896; EVL\_HUMAN, Q9UI08; WASP\_HUMAN, P42768). Conserved amino acids are colored according to their chemical characteristics and role in the interactions with actin and profilin (green, hydrophobic; blue, basic; red, acidic; yellow, small conserved amino acid, purple, poly-Pro region). The GAB (WH2) was aligned with the FAB (C region) to stress the relationship between their sequences, both of which form amphiphilic  $\alpha$ -helices. Although the acidic region of WASP is not conserved in Ena/VASP, a high density of negatively charged amino acids in this region of Ena/VASP further suggests a common evolutionary origin of these two protein families.

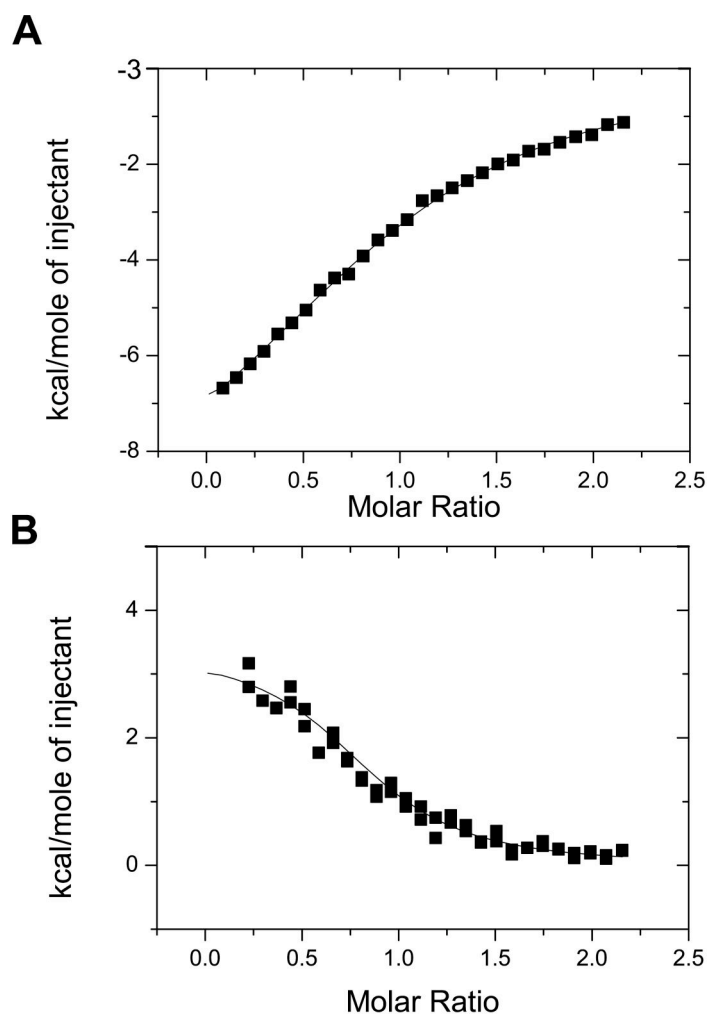

**Supplementary Figure 2.** Binding to profilin and profilin-actin of a peptide comprising the loading poly-Pro site of human VASP (amino acids 198-213) measured by isothermal titration calorimetry. **(A)** Binding isotherm produced by integration of the heat of 10  $\mu$ L injections of a 1 mM solution of the VASP peptide into a 100  $\mu$ M solution of profilin. The experiment was performed at 25°C in 10 mM sodium phosphate pH 7.4 and 150 mM NaCl. The line represents a non-linear least squares fit to the data using a single-site binding model. For this experiment,  $n = 0.93$ ,  $K_D = 50 \mu\text{M}$  peptide, and  $\Delta H^\circ_{\text{bind}} = -10.15 \text{ kcal mol}^{-1}$ . **(B)** Binding isotherm produced under similar conditions by integration of the heat of injection of the VASP peptide (at 0.8 mM) into a solution of purified profilin-actin complex (at 80  $\mu$ M). The binding was endothermic in character and resulted in estimated  $n = 0.86$ ,  $K_D = 8 \mu\text{M}$  peptide, and  $\Delta H^\circ_{\text{bind}} = 3.369 \text{ kcal mol}^{-1}$ .

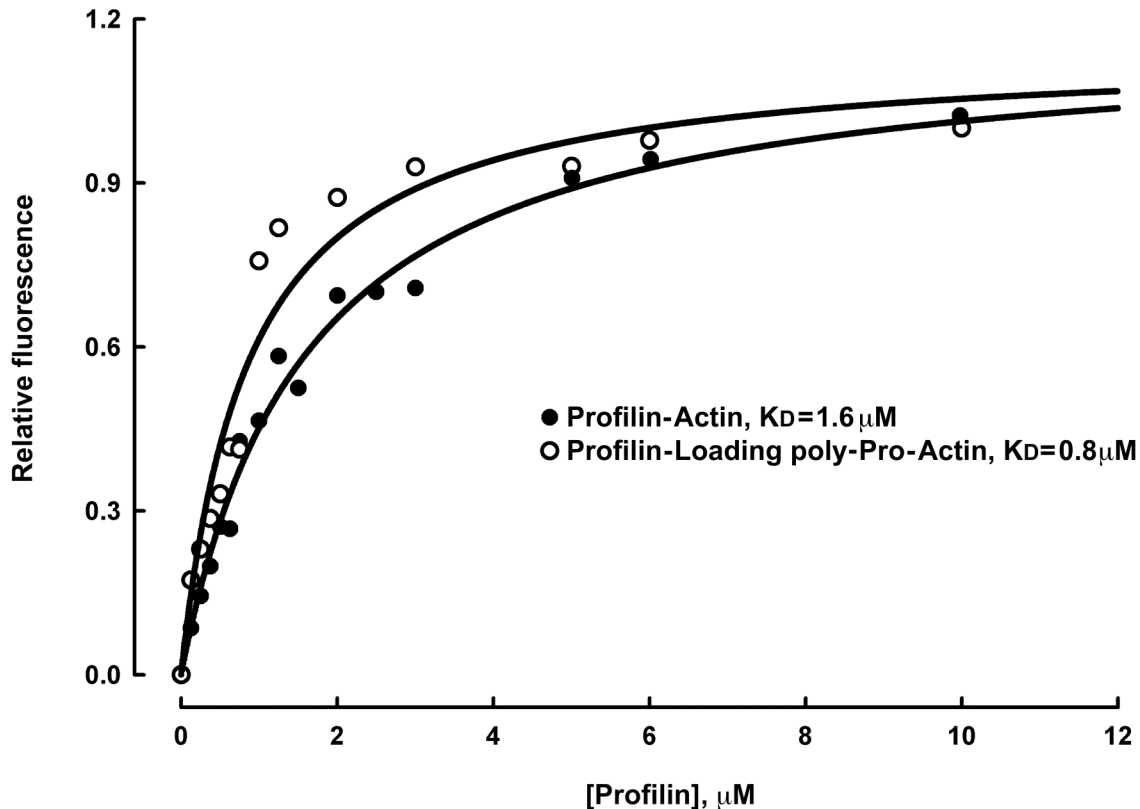

**Supplementary Figure 3.** Binding to actin of profilin alone and the complex of profilin with the loading poly-Pro peptide of VASP. The binding affinities were measured by the change of intrinsic tryptophan fluorescence using a Cary Eclipse Fluorescence spectrophotometer (Varian). The measurements and the analysis of raw data were carried out according published procedures (Perelroizen et al., 1994; Vinson et al., 1998). The excitation wavelength was set to 295 nm and the emission spectra were recorded from 300 to 400 nm. The measurements were performed at 20°C in 2 mM Tris pH 7.4, 0.2 mM  $\text{CaCl}_2$  and 0.2 mM ATP. The concentration of actin in the cell was fixed to 1  $\mu\text{M}$ . Profilin alone and complexed with 2-fold molar excess of the loading poly-Pro peptide of VASP were added at varying concentrations (0, 0.125, 0.375, 0.5, 0.6, 0.75, 1, 1.25, 1.5, 2, 2.5, 3, 4, 5, 6 and 10  $\mu\text{M}$ ). The raw data were corrected to account for the intrinsic fluorescence of profilin and actin alone as described (Vinson et al., 1998). Each data point represents the average of 6 independent measurements. Least-square fitting of the data, using a single-site binding model, resulted in dissociation constants ( $K_D$ ) of actin for profilin and profilin-poly-Pro peptide of 1.6  $\mu\text{M}$  and 0.8  $\mu\text{M}$ , respectively.

Perelroizen, I., Marchand, J.B., Blanchoin, L., Didry, D. and Carlier, M.F. (1994) Interaction of profilin with G-actin and poly(L-proline). *Biochemistry*, **33**, 8472-8478.

Vinson, V.K., De La Cruz, E.M., Higgs, H.N. and Pollard, T.D. (1998) Interactions of Acanthamoeba profilin with actin and nucleotides bound to actin. *Biochemistry*, **37**, 10871-10880.

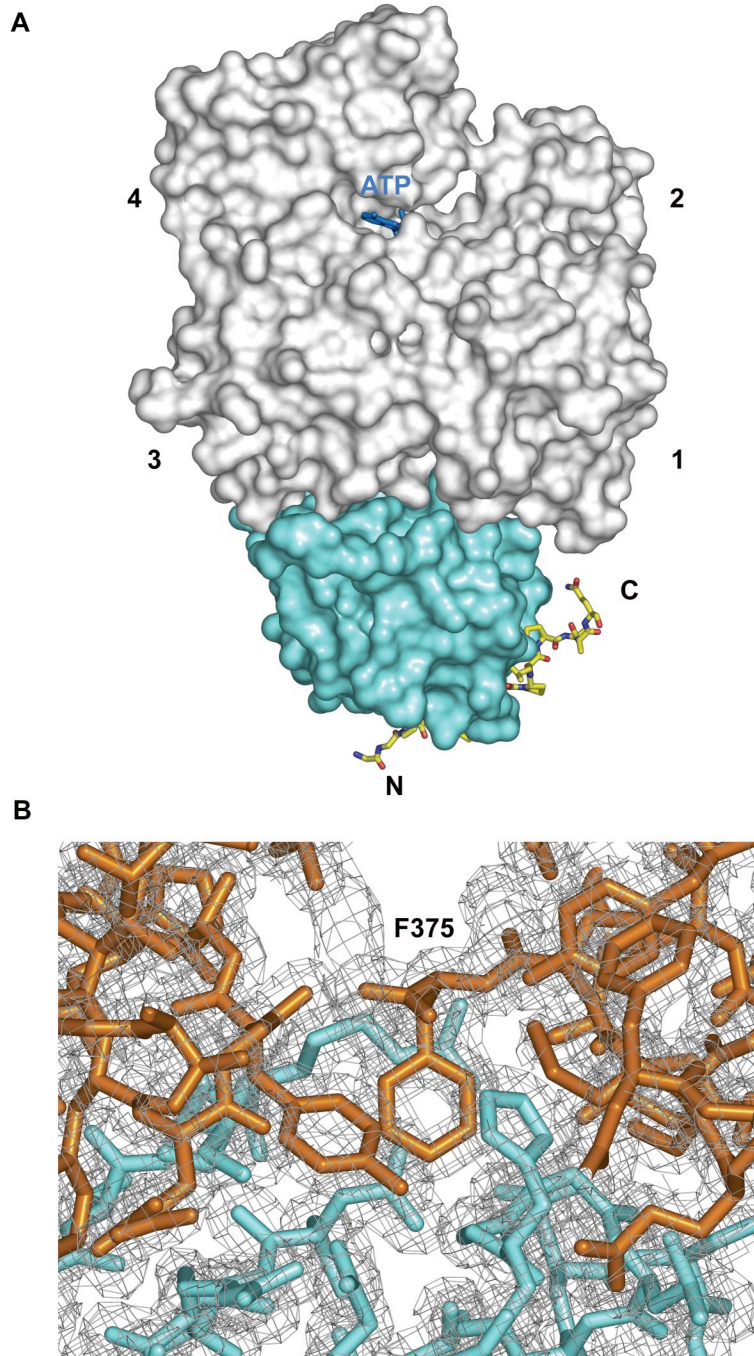

**Supplementary Figure 4.** Crystal structure at 1.8 Å resolution of the ternary complex of profilin-actin with the loading poly-Pro site of human VASP. **(A)** View according to the conventional orientation of actin. **(B)** Electron density map contoured at 1.0  $\sigma$ , at the profilin (cyan) actin (gold) interface of the complex. The C-terminal actin residue Phe 375 is at the center of the binding interface between the two proteins.

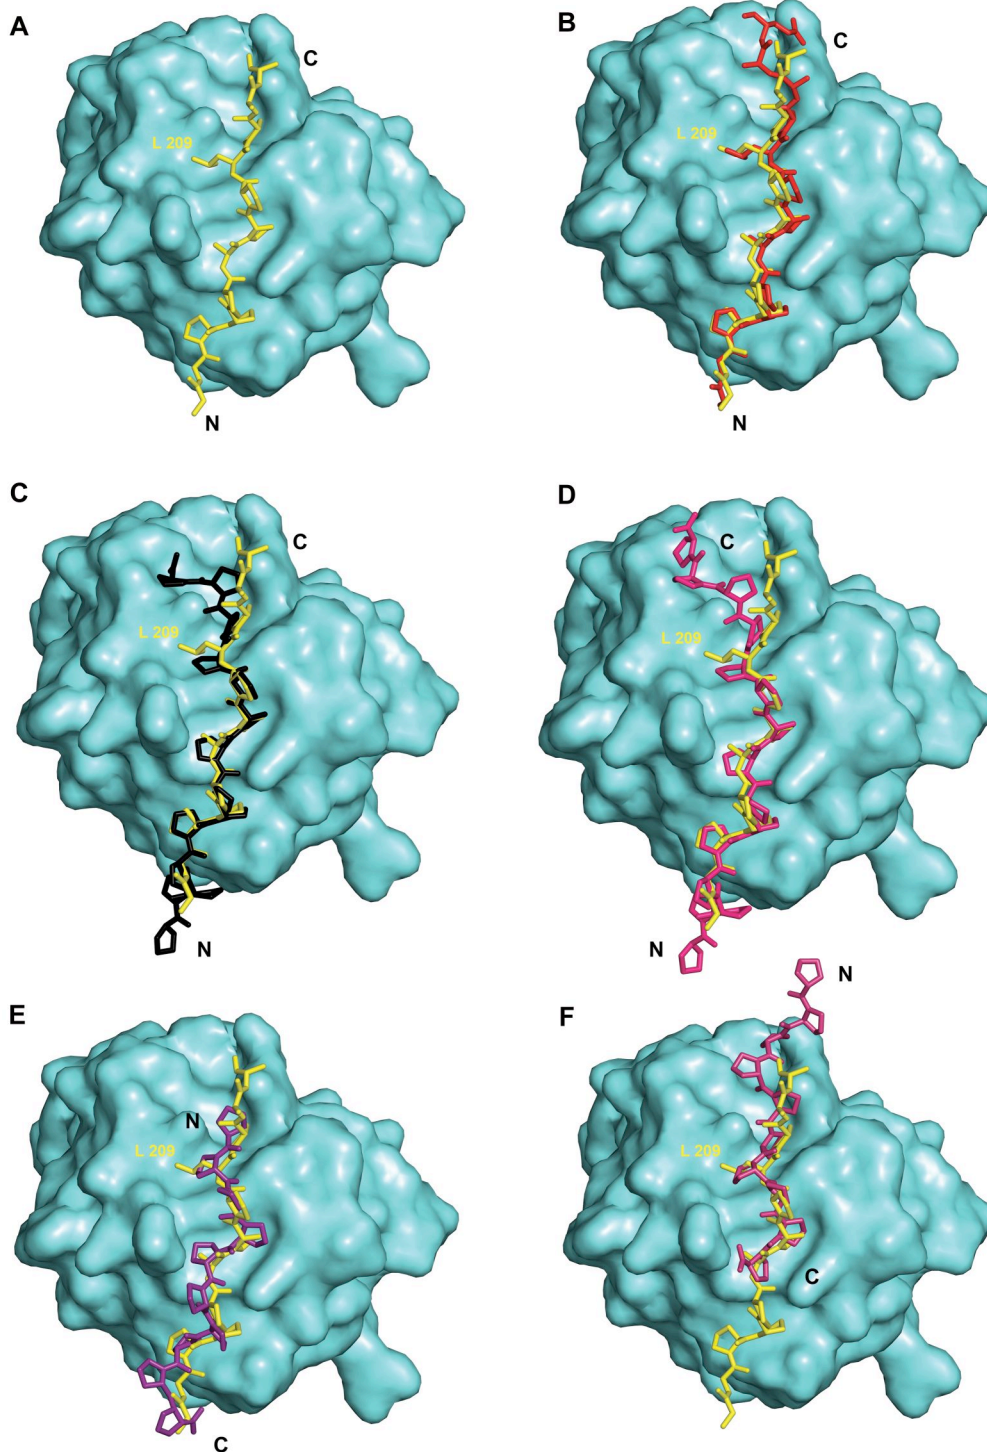

**Supplementary Figure 5.** Comparison of the binding of the loading poly-Pro site of VASP in the structure of its complex with profilin-actin with those of plain poly-Pro sequences crystallized with profilin alone (Mahoney et al., 1997; Mahoney et al., 1999). **(A)** Loading poly-Pro (yellow) bound to profilin (cyan) from the higher resolution structure of the loading poly-Pro-GAB of VASP. **(B,C,D,E,F)** Comparisons with the structures of the loading poly-Pro site alone (red), chain A of the pentadecameric L-Pro peptide (black), chain B of the pentadecameric L-Pro peptide (pink), first orientation of the decameric L-Pro peptide (purple), and second orientation of the decameric L-Pro peptide (magenta).

**Supplementary Movie 6.** Structure at 1.5 Å resolution of profilin-actin with the loading poly-Pro-GAB region of human VASP. The linker region (blue), which is not seen in the structure, was modeled following a groove along the actin-profilin interface.
